# Supplementary material
Source: publisher figshare collection journal article supplement (https://acs.figshare.com/ndownloader/files/5115535)
Supplement: Supplementary file 1 [file 5115535]

# Supplementary Information for:

## Extracting Markov models of peptide conformational dynamics from simulation data

Verena Schultheis, Thomas Hirschberger, Heiko Carstens, Paul Tavan

Lehrstuhl für Biomolekulare Optik, Ludwig-Maximilians-Universität,  
Oettingenstr. 67, 80538 München, Germany

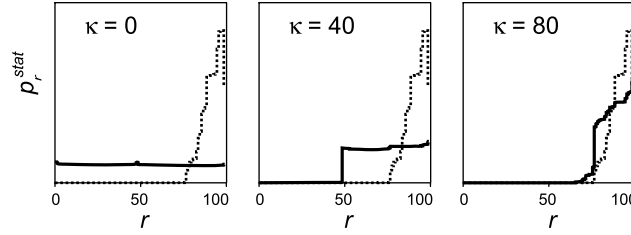

Figure 1: Solid lines: Stationary distributions  $\mathbf{p}_{stat}$  for  $\kappa \in \{0, 40, 80\}$  and  $x_t = 0.66$  as in Fig. 4 of the manuscript. At  $\kappa = 0$  the peaked initial distribution (dashed lines) converges to the uniform distribution, at  $\kappa \in \{40, 80\}$  it becomes more and more localized near the intermediate metastable states of the linear dynamics (cf. Fig. 4 of our article) in the right half of the 100-dimensional state space.

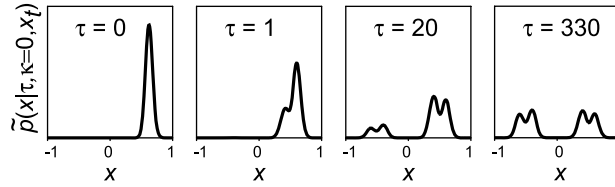

Figure 2: Temporal evolution of the virtual density  $\tilde{p}(\mathbf{x}|\tau, \kappa = 0, x_t)$  for a linear dynamics (cf. Fig. 4 of the manuscript). As dictated by the starting value  $x_t = 0.66$  the density is initially ( $\tau = 0$ ) concentrated near the right maximum  $x_4 = 0.6$  of the data distribution (cf. Fig. 2 of our article) and immediately starts spreading towards the mixture model (2) of the invariant density  $p_{inv}(\mathbf{x})$ .

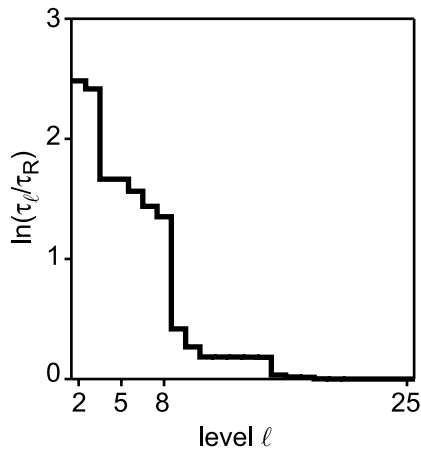

Figure 3: Logarithmic plot of the fastest relaxation time scales  $\tau_\ell$  measured in units of  $\tau_R$  at the 24 steps of the recursive coarse-graining procedure applied to the transfer operator of the tripeptide. The figure is analogous to Fig. 9 of our article, which pertains to the one-dimensional model trajectory. In the transition from hierarchy level  $\ell = 9$  to  $\ell = 8$  a large increase of the fastest relaxation time scale is observed, which indicates that an eight-state model should describe the key features of the conformational dynamics in the peptide.
